# Supplementary material
Source: PubMed Central journal article supplement (PMC2667740)

## Supplementary information

### Supplementary method. **RT-PCR analysis**

The total RNA was extracted using TRIzol reagent and RT-PCR was carried out with a RT-PCR kit (Invitrogen). The primer sequences for E6-AP and  $\beta$ -actin were as follows: E6-APF, 5'-AACTGAGGGCTGTGGAAATG-3'; E6-APR, 5'-TCCGAAAGCTCAGAACCAGT-3'; ActinF, 5'-TACAGCTTCACCACC-3'; ActinR, 5'-ATGCCACAGGATTTC-3'. PCR conditions for E6-AP and  $\beta$ -actin were same: an initial denaturation step at 94°C for 4 mins and then cycling through 94°C for 30 sec denaturation, 60°C for 30 sec annealing, 72°C for 45 sec extension and a final extension step at 72°C for 5 min. The cycle number for E6-AP was 30 and for  $\beta$ -actin was 23.

### Supplementary Fig.S1. **The mRNA level of E6-AP is increased under various stress conditions.**

(A) Neuro 2a cells were treated with H<sub>2</sub>O<sub>2</sub> (0.25 mM for 2 h),  $\beta$ -mercaptoethanol (5 mM for 2 h), tunicamycin (5  $\mu$ g/ml for 4 h) and MG132 (5  $\mu$ M for 4 h). Cells were collected and subjected for RNA extraction followed by RT-PCR analysis of E6-AP and  $\beta$ -actin. (B) Dose-dependent effect of proteasome inhibitor, MG132 (exposed for 4 h) on E6-AP mRNA levels. (C) Time-course studies of the effect of MG132 (5  $\mu$ M) on E6-AP mRNA levels. (D) Effect of heat stress on E6-AP mRNA levels. Cells were exposed to 45°C for 30 mins and then returned back to the normal incubator for 1 hrs. (E, F, G and H)

Quantitation of the E6-AP band intensities as shown in A, B, C and D respectively collected from three independent experiments using NIH image analysis software. Data were expressed as ratio of E6-AP to  $\beta$ -actin. Values are means  $\pm$  SD of three independent experiments. \* $p < 0.05$  as compared to respective control. Tuni, Tunicamycin; BME,  $\beta$ -mercaptoethanol. (I) Schematic diagram of the 5'UTR sequences of *UBE3A* gene. Dark area represents the consensus HSF1 binding sequences (AGAAN).

**Supplementary Fig.S2. Formation of GFP-CFTR aggresomes upon proteasome inhibition.**

Cos-7 cells were plated onto 2-well chamber slides and transfected with GFP-CFTR plasmid. Thirty-six hours of post transfection, cells were treated with MG132 for 8 h. The cells were then subjected to immunofluorescence staining using  $\gamma$ -tubulin and Hsp70 antibodies. Rhodamine-conjugated secondary antibody was used to stain  $\gamma$ -tubulin and Hsp70. Arrow indicates the GFP-CFTR aggresome and localization of Hsp70 to GFP-CFTR aggresome. Scale bar, 20  $\mu$ m.

**Fig.S1**

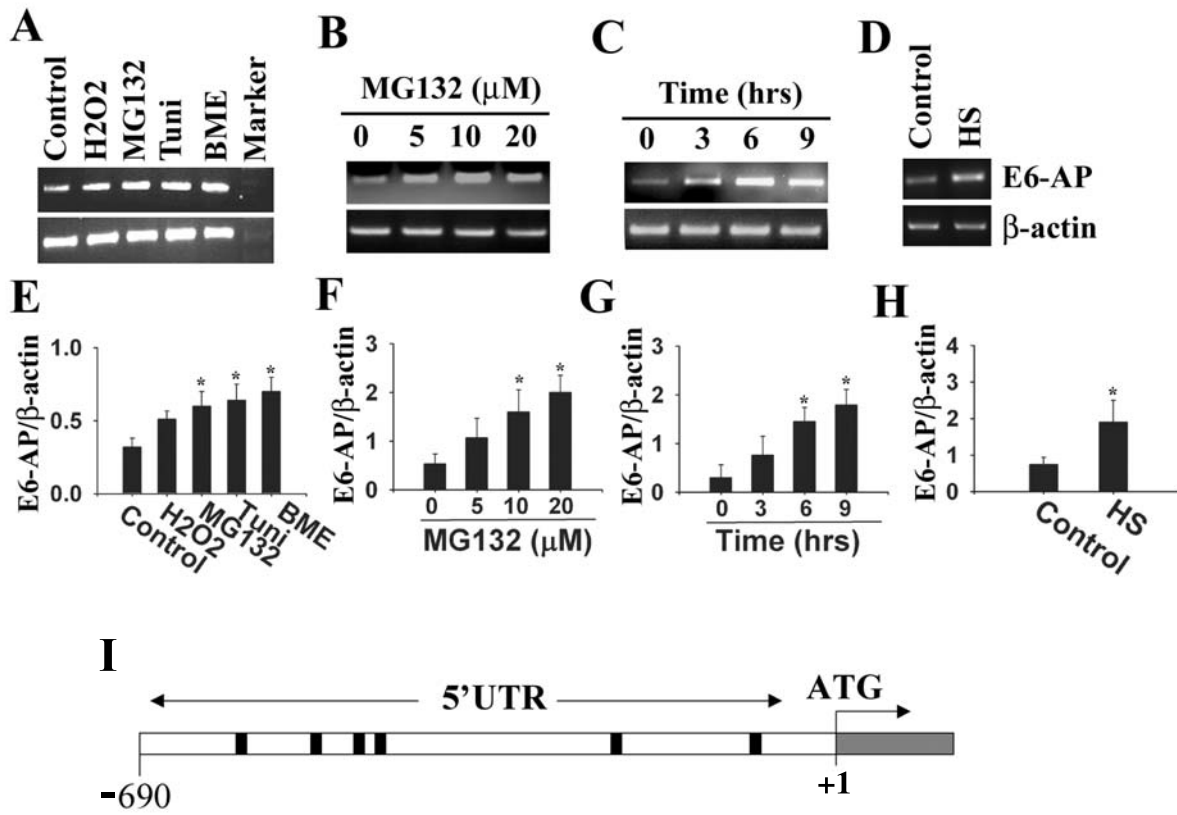

**Fig.S2**

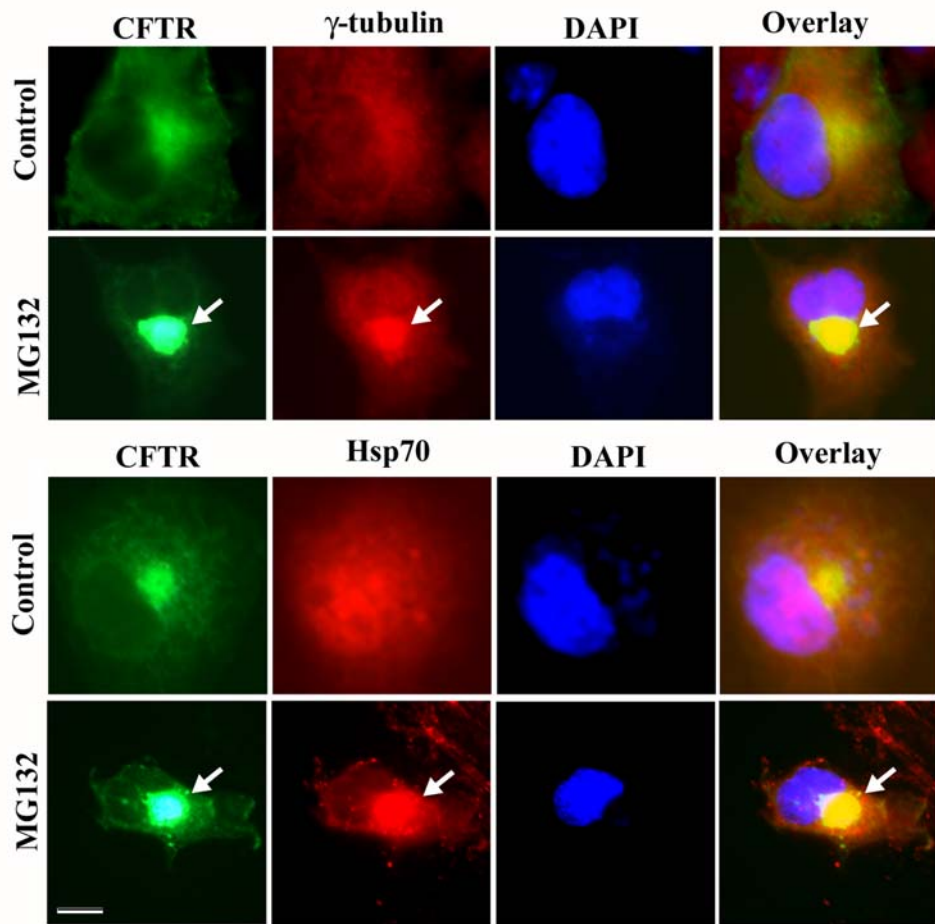

Supplement: M806804200_1.pdf [file M806804200_1.pdf]
